# Supplementary material for: Improving the photoelectrochemical activity of La5Ti2CuS5O7 for hydrogen evolution by particle transfer and doping
Source: Royal Society of Chemistry journal article supplement (doi:10.1039/c4ee00091a), 2014-01-01
Supplement: c4ee00091a1.pdf [file c4ee00091a1.pdf]

## **Supporting Information for**

### **Improving the photoelectrochemical activity of $\text{La}_5\text{Ti}_2\text{CuS}_5\text{O}_7$ for hydrogen evolution by particle transfer and doping**

#### **List of the authors**

Jingyuan LIU, Takashi HISATOMI, Guijun MA, Aki IWANAGA, Tsutomu MINEGISHI,  
Yosuke MORIYA, Masao KATAYAMA, Jun KUBOTA, Kazunari DOMEN \*

#### **\*Corresponding author**

Professor Kazunari DOMEN

Department of Chemical System Engineering, School of Engineering, The University of  
Tokyo, 7-3-1 Hongo, Bunkyo-ku, Tokyo 113-8656, Japan

Tel: +81-3-5841-1148

Fax: +81-3-5841-8838

E-mail: domen@chemsys.t.u-tokyo.ac.jp

#### **Affiliation and full postal address**

Department of Chemical System Engineering, School of Engineering, The University of  
Tokyo, 7-3-1 Hongo, Bunkyo-ku, Tokyo, 113-8656, Japan

## Experimental details

$\text{La}_5\text{Ti}_2\text{CuS}_5\text{O}_7$  was prepared by solid-state reactions.<sup>S1</sup> First,  $\text{La}_2\text{O}_3$  (99.99%, Kanto Chemical Co., Inc.),  $\text{La}_2\text{S}_3$  (99.9%, Kojundo Chemical Laboratory Co., Ltd.),  $\text{TiO}_2$  (99.99%, Rare Metallic Co., Ltd.) and  $\text{Cu}_2\text{S}$  (99%, Kojundo Chemical Laboratory Co., Ltd.) were mixed at a molar ratio of  $\text{La}_2\text{O}_3:\text{La}_2\text{S}_3:\text{TiO}_2:\text{Cu}_2\text{S} = 2:3:4:1$  in a  $\text{N}_2$  circulated glove box. For substitution of Ta, Nb, Sc and Ga at the Ti site of  $\text{La}_5\text{Ti}_2\text{CuS}_5\text{O}_7$ , the amount of  $\text{TiO}_2$  was decreased and the corresponding amounts of  $\text{Ta}_2\text{O}_5$  (99.9%, Wako Pure Chemical Industries, Ltd.),  $\text{Nb}_2\text{O}_5$  (Optical grade, CBMM),  $\text{Sc}_2\text{O}_3$  (99.95%, Kanto Chemical Co., Inc.) and  $\text{Ga}_2\text{O}_3$  (99.9%, Kojundo Chemical Laboratory Co., Ltd.) were added. For substitution of Ca at the La site, the amount of  $\text{La}_2\text{O}_3$  was decreased and the corresponding amount of  $\text{CaO}$  (99.9%, Wako Pure Chemical Industries., Ltd.) was added. The precursor mixture was sealed in evacuated quartz tubes and heated at 1273 K for 48 h. After heating, the samples were ground into powder. During the heating process at high temperature under vacuum, metal sulphide could decompose to produce gaseous sulphur and metal cations could be reduced. To suppress this, the vapour pressure of sulphur inside the quartz tubes was increased by deliberately adding 5% excess sulphur (99.99%, Kojundo Chemical Laboratory Co., Ltd.) into the precursor mixtures. The  $\text{La}_5\text{Ti}_2\text{CuS}_5\text{O}_7$  samples prepared with excess sulphur are denoted as  $\text{La}_5\text{Ti}_2\text{CuS}_5\text{O}_7(\text{S})$ . The samples were characterized by X-ray diffraction (XRD, RIGAKU, RINT Ultima III), UV-Visible diffuse reflectance spectroscopy (UV-vis DRS, JASCO, V-560), and field-emission scanning electron microscopy (FE-SEM, Hitachi, S-4700). Cu-K edge X-ray absorption near edge structures (XANES) were measured at the BL9C beamline of the Photon Factory (High Energy Accelerator Research Organization, Tsukuba, Japan) using a ring energy of 2.5 GeV and stored current of 400 mA (Proposal No. 2012G650).

Photocatalytic reactions were carried out in a Pyrex reaction vessel connected to a glass closed gas circulation system. A solution (200 mL) of  $\text{Na}_2\text{S}$  (0.01 M) and  $\text{Na}_2\text{SO}_3$  (0.01 M) was used for the  $\text{H}_2$  evolution reactions. A solution containing 0.20 g of a photocatalyst was

evacuated until the air was removed completely and then irradiated with a 300-W Xe lamp through a cutoff filter ( $\lambda > 420$  nm). Pt was deposited as a catalyst for H<sub>2</sub> evolution by impregnation of H<sub>2</sub>PtCl<sub>6</sub>·6 H<sub>2</sub>O, followed by H<sub>2</sub> reduction at 473 K. The reactant solution was maintained at room temperature by a flow of cooling water during the reaction. The evolved gases were analysed by gas chromatography.

Electrodes of La<sub>5</sub>Ti<sub>2</sub>CuS<sub>5</sub>O<sub>7</sub> were made by the particle transfer method.<sup>S2</sup> La<sub>5</sub>Ti<sub>2</sub>CuS<sub>5</sub>O<sub>7</sub> powder was dispersed in 2-propanol and deposited on a glass plate. After the 2-propanol dried off, a 2- $\mu$ m-thick Au layer was deposited on the sample as a contact layer by vacuum evaporation. Then, a carbon tape supported by a glass slide was used to peel off the Au layer and La<sub>5</sub>Ti<sub>2</sub>CuS<sub>5</sub>O<sub>7</sub> powder from the original glass plate. Excess particles were removed by sonication. Subsequently, 1-nm-thick Pt was deposited as a catalyst by radio frequency magnetron sputtering. The final structure of the electrodes was Pt/La<sub>5</sub>Ti<sub>2</sub>CuS<sub>5</sub>O<sub>7</sub>/Au/carbon tape/glass from top to bottom. Scanning electron microscope (SEM) images of 1%Sc doped-La<sub>5</sub>Ti<sub>2</sub>CuS<sub>5</sub>O<sub>7</sub>(S) electrode is shown in Fig. S9. In some experiments, 1-nm-thick Ni was deposited instead of Pt by vacuum evaporation. An electric wire was connected to the surface of the electrode using indium solder and covered with epoxy resin.

The PEC measurement was carried out in a three-electrode system, using Pt and Ag/AgCl electrodes as counter and reference electrode, respectively. A solution (100 mL) of 0.1 M Na<sub>2</sub>SO<sub>4</sub> was used as electrolyte solution. The pH of the solution was adjusted to 10 by NaOH. A 300-W Xe lamp was used as a light source. Photoelectrodes were irradiated through a cutoff filter ( $\lambda > 420$  nm). The potential of the electrode was controlled by a potentiostat (Hokutodenko, HSV-100). IPCE was measured at 0 V vs. RHE under the illumination of a 300-W Xe lamp equipped with a series of band pass filters.

## References

S1 V. Meignen, L. Cario, A. Lafond, Y. Moëlo, C. Guillot-Deudon, A. Meerschaut, *J. Solid State Chem.*, 2004, **177**, 2810.

S2 T. Minegishi, N. Nishimura, J. Kubota, K. Domen, *Chem. Sci.*, 2013, **4**, 1120.

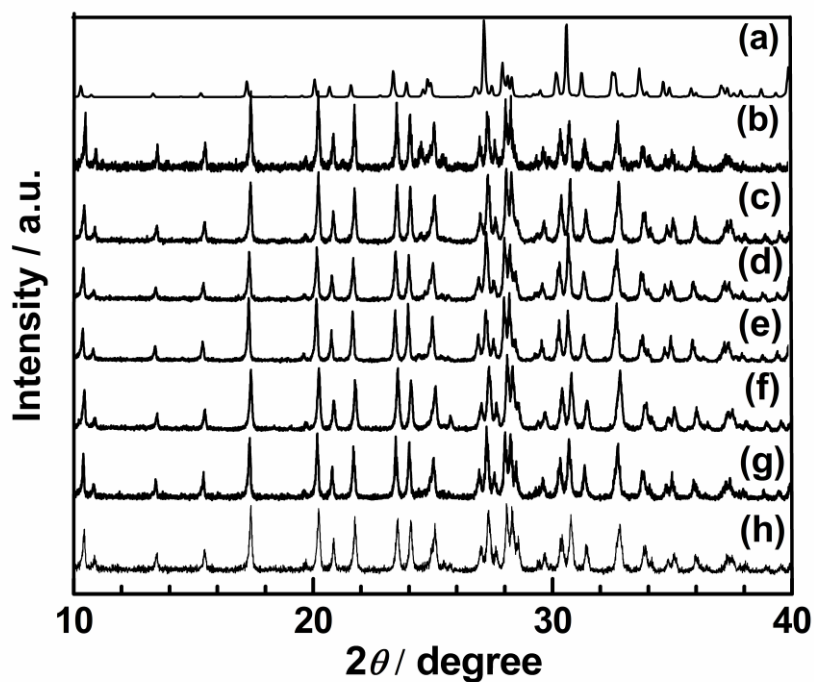

**Figure S1.** XRD patterns for (a) the reference  $\text{La}_5\text{Ti}_2\text{CuS}_5\text{O}_7$  (ICSD #99612), (b)  $\text{La}_5\text{Ti}_2\text{CuS}_5\text{O}_7$ , and (c) undoped, (d) 1% Sc-doped, (e) 1% Ga-doped, (f) 1% Ca-doped (g) 1% Ta-doped and (h) 1% Nb-doped  $\text{La}_5\text{Ti}_2\text{CuS}_5\text{O}_7(\text{S})$ .

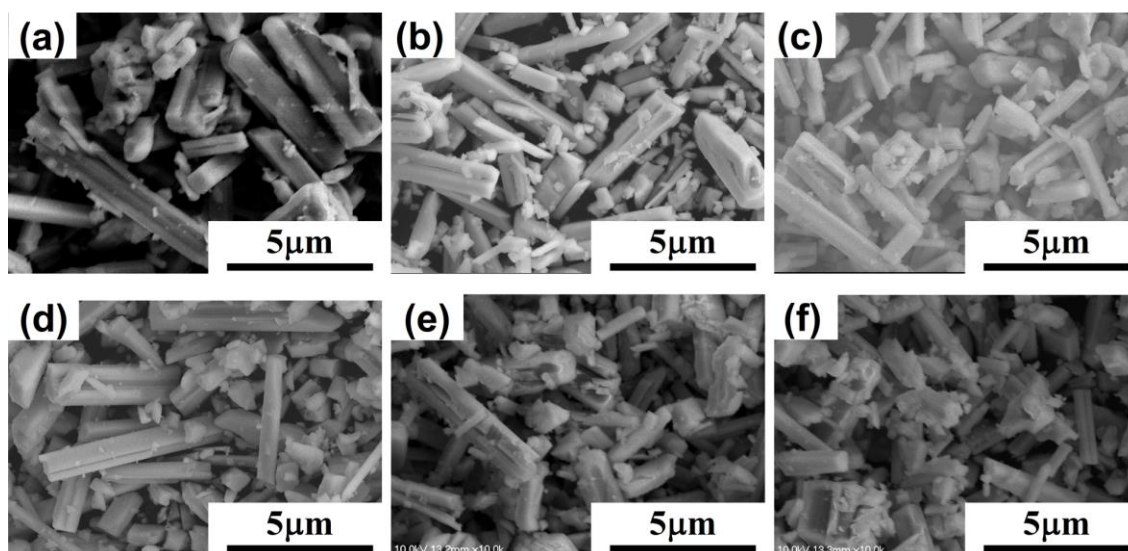

**Figure S2.** SEM images of (a)  $\text{La}_5\text{Ti}_2\text{CuS}_5\text{O}_7$ , and (b) undoped, (c) 1% Sc-doped, (d) 1% Ga-doped, (e) 1% Ta-doped, and (f) 1% Nb-doped  $\text{La}_5\text{Ti}_2\text{CuS}_5\text{O}_7(\text{S})$ .

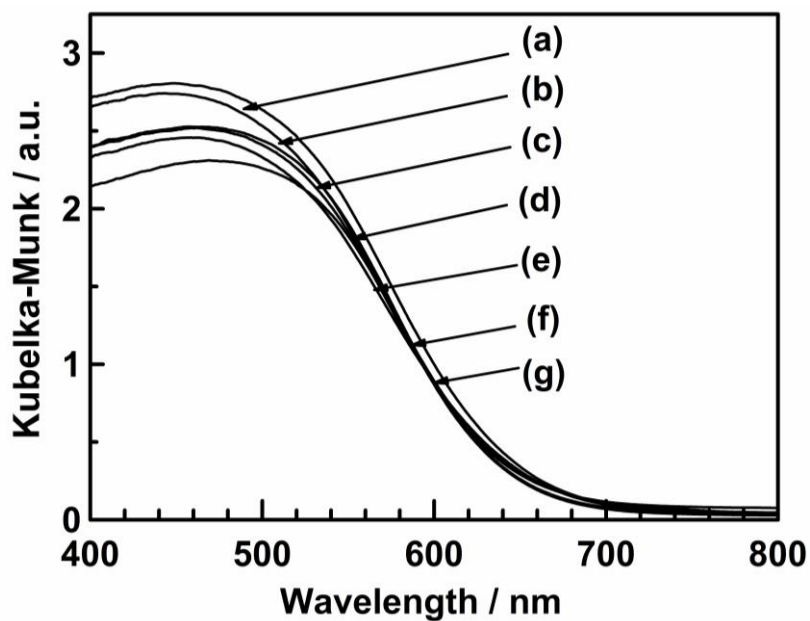

**Figure S3.** DRS of (a)  $\text{La}_5\text{Ti}_2\text{CuS}_5\text{O}_7$ , and (b) undoped, (c) 1% Sc-doped, (d) 1% Ga-doped, (e) 1% Ca-doped, and (f) 1% Ta-doped, and (g) 1% Nb-doped  $\text{La}_5\text{Ti}_2\text{CuS}_5\text{O}_7(\text{S})$ .

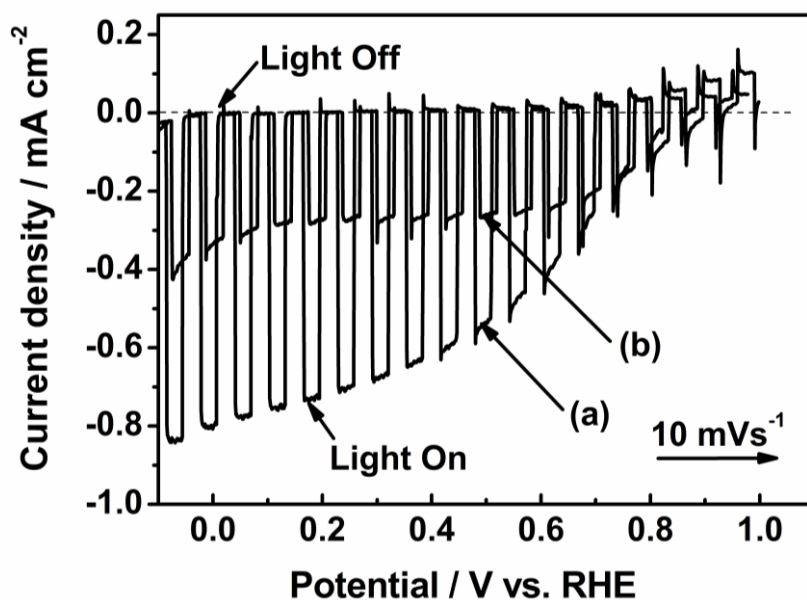

**Figure S4.**  $I$ - $E$  curves for 1% Sc-doped  $\text{La}_5\text{Ti}_2\text{CuS}_5\text{O}_7(\text{S})$  photocathodes modified with (a) 1-nm-thick Pt and (b) 1-nm-thick Ni. Electrolyte,  $\text{Na}_2\text{SO}_4$  aq (pH 10); light source, 300-W Xe lamp ( $\lambda > 420$  nm).

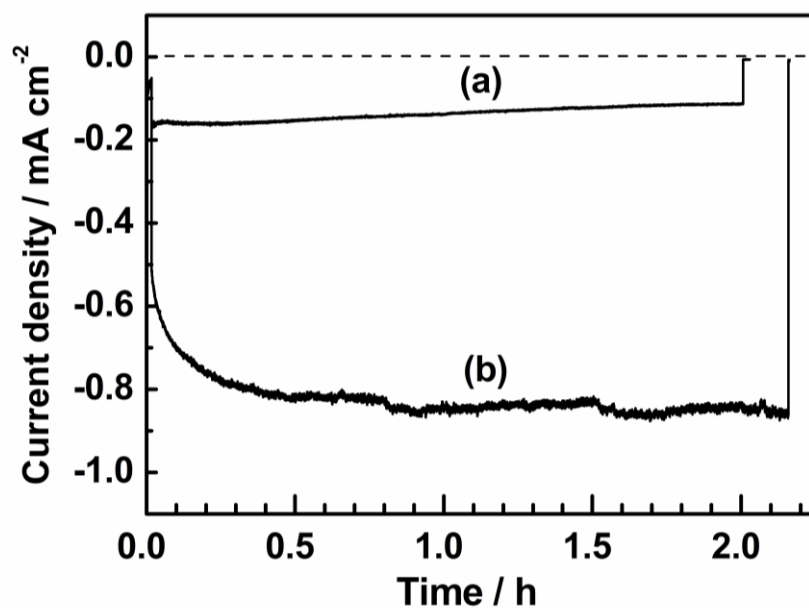

**Figure S5.** Time course of current density for (a) undoped and (b) 1% Sc-doped  $\text{La}_5\text{Ti}_2\text{CuS}_5\text{O}_7(\text{S})$  photocathodes under irradiation at 0 V vs. RHE. Electrolyte,  $\text{Na}_2\text{SO}_4$  aq (pH 10); light source, 300-W Xe lamp ( $\lambda > 420$  nm).

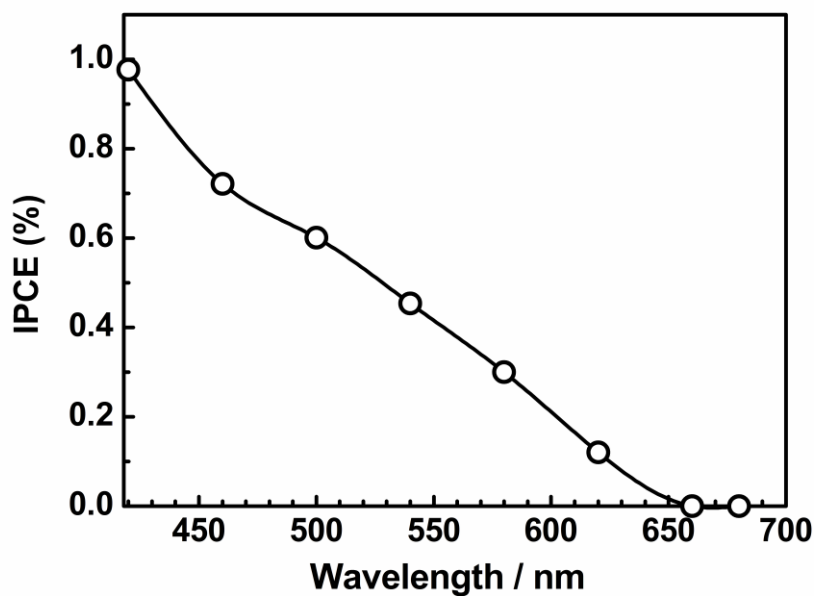

**Figure S6.** IPCE spectrum of 1% Sc-doped  $\text{La}_5\text{Ti}_2\text{CuS}_5\text{O}_7(\text{S})$ . Pt was deposited by sputtering for  $\text{H}_2$  evolution. Electrolyte,  $\text{Na}_2\text{SO}_4$  aq (pH 10); light source, 300-W Xe lamp equipped with various band pass filters.

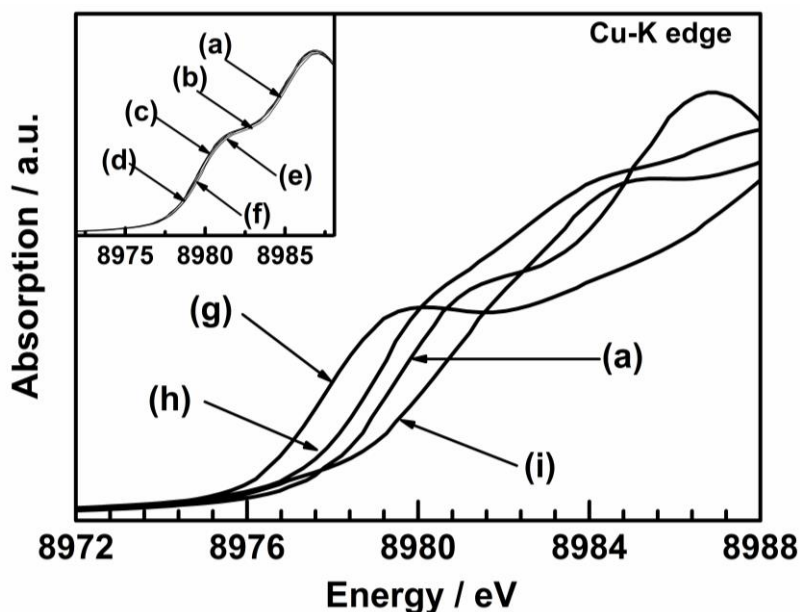

**Figure S7.** Cu-K edge XANES curves for (a) undoped, (b) 0.1% Sc-doped, (c) 1% Sc-doped, (d) 3%Sc-doped, (e) 5% Sc-doped, (f) 10% Sc-doped  $\text{La}_5\text{Ti}_2\text{CuS}_5\text{O}_7(\text{S})$ , (g) Cu, (h)  $\text{Cu}_2\text{S}$ , and (i)  $\text{CuS}$ .

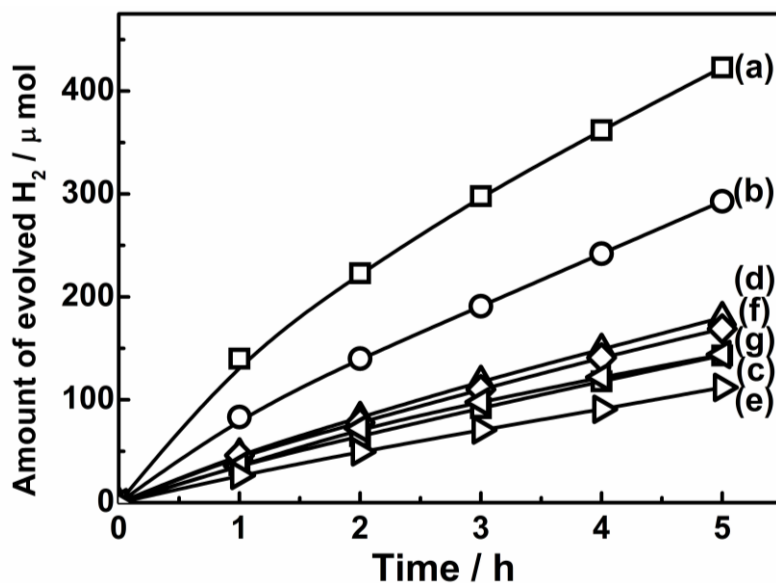

**Figure S8.**  $\text{H}_2$  evolution rates for (a)  $\text{La}_5\text{Ti}_2\text{CuS}_5\text{O}_7$ , and (b) undoped, (c) 1% Sc-doped, (d) 1% Ga-doped, (e) 1% Ca-doped, (f) 1% Ta-doped, and (g) 1% Nb-doped  $\text{La}_5\text{Ti}_2\text{CuS}_5\text{O}_7(\text{S})$ . Pt was deposited by impregnation for  $\text{H}_2$  evolution. Sacrificial reagent (200 ml),  $\text{Na}_2\text{S}$  aq (0.01 M) and  $\text{Na}_2\text{SO}_3$  aq (0.01 M); light source, 300-W Xe lamp ( $\lambda > 420$  nm).



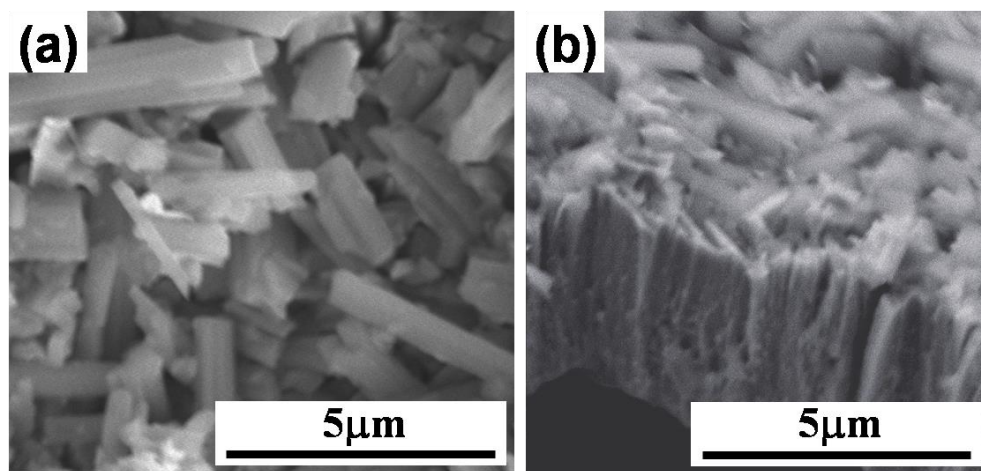

**Figure S9.** (a) Top-view and (b) cross-sectional SEM images of a 1% Sc doped-La<sub>5</sub>Ti<sub>2</sub>CuS<sub>5</sub>O<sub>7</sub> (S) electrode prepared by the PT method.
